# Supplementary material for: Porphyrin-based thick-film bulk-heterojunction solar cells for indoor light harvesting
Source: Royal Society of Chemistry journal article supplement (doi:10.1039/c8tc02838a), 2018-01-01
Supplement: c8tc02838a1.pdf [file c8tc02838a1.pdf]

## Supporting Information

### **Porphyrin-Based Thick-Film Bulk-Heterojunction Solar Cells for Indoor Light Harvesting**

*Hang Yin<sup>#</sup>, Song Chen<sup>#</sup>, Sin Hang Cheung, Ho Wa Li, Yuemin Xie, Sai Wing Tsang, Xunjin Zhu<sup>\*</sup>,*

*Shu Kong So<sup>\*</sup>*

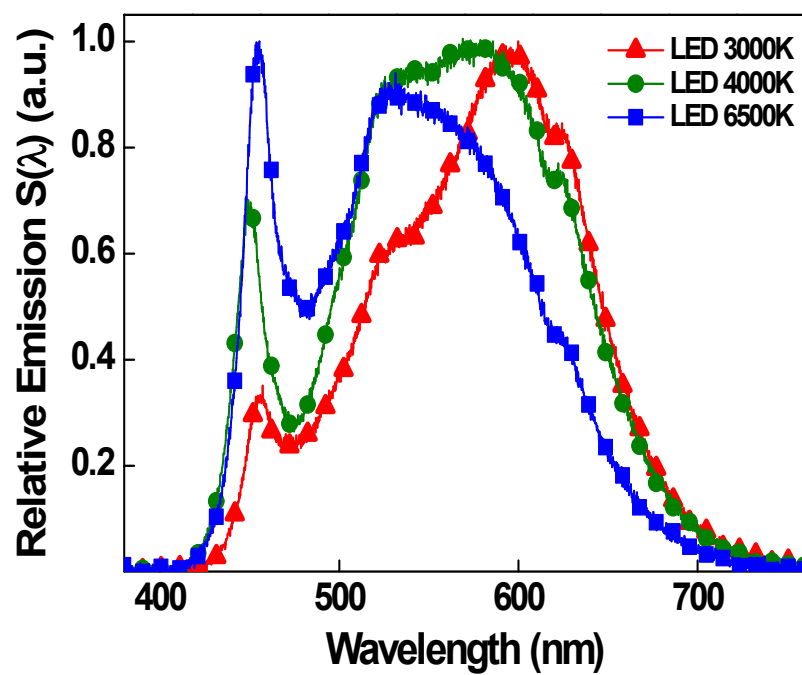

**Figure S1.** The emission spectra of LED tubes with color temperatures of 3000K, 4000K, and 6500K.

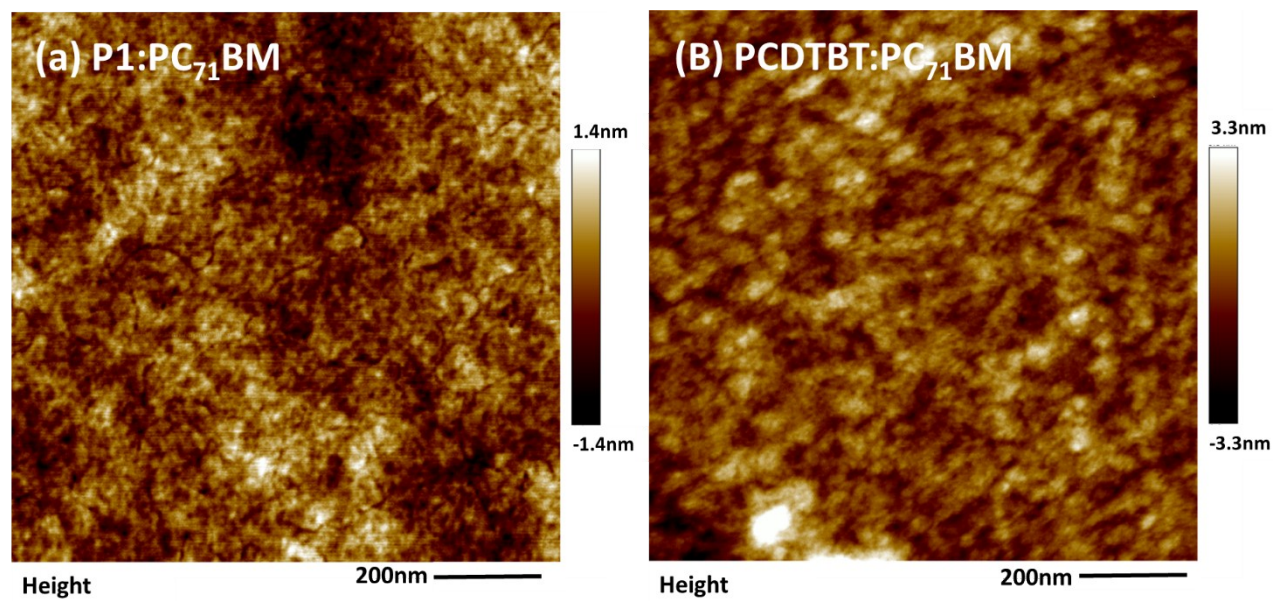

**Figure S2.** Nanostructures of optimized (a) P1:PC<sub>71</sub>BM, and (b) PCDTBT:PC<sub>71</sub>BM BHJ films.
